# Supplementary material
Source: MDPI journal article supplement (https://www.mdpi.com/2073-4344/13/2/226)
Supplement: s1 [file s1]

# Photocatalytic Degradation of Pharmaceutical Amisulpride Using g-C<sub>3</sub>N<sub>4</sub> Catalyst and UV-A Irradiation

Maria Antonopoulou, Maria Papadaki, Ilaira Rapti, Ioannis Konstantinou

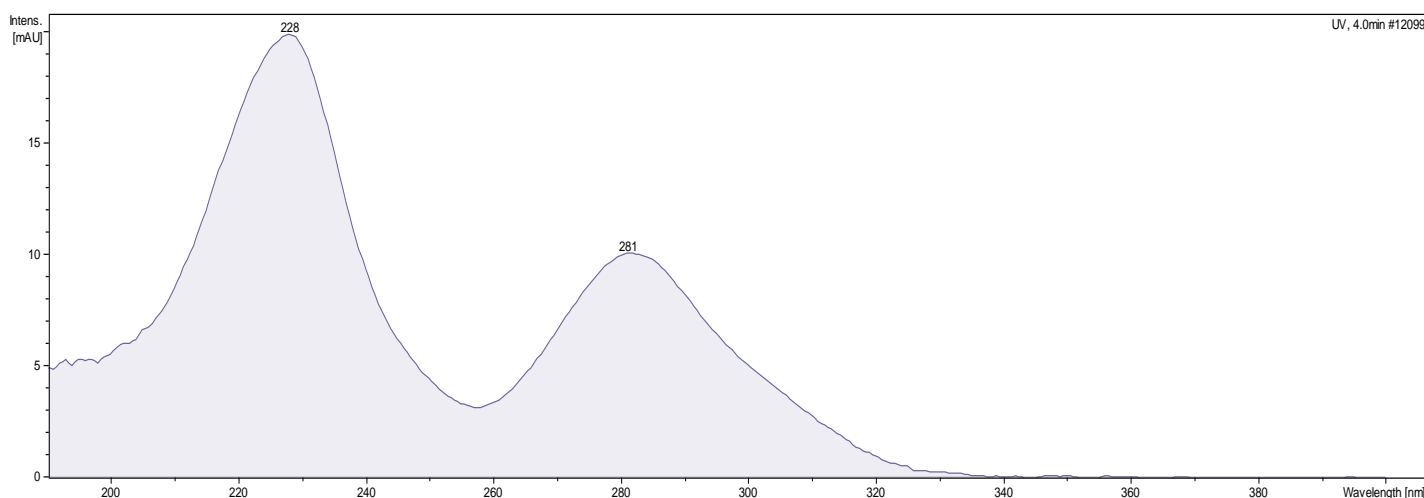

**Figure S1.** UV-Vis spectrum of amisulpride ( $[\text{amisulpride}]_0 = 1 \text{ mg L}^{-1}$ ).

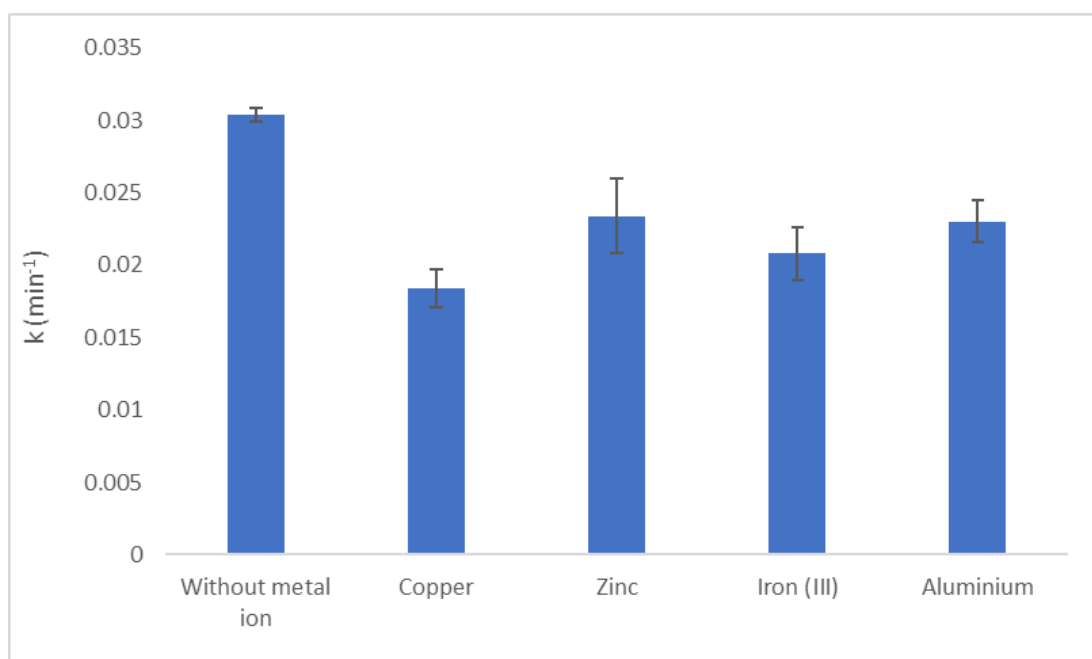

**Figure S2.** Effect of metal ions on the photocatalytic degradation of amisulpride in UW ( $[\text{amisulpride}]_0 = 1 \text{ mg L}^{-1}$ ,  $[\text{metal ion}]_0 = 10 \text{ mg L}^{-1}$ ,  $[\text{g-C}_3\text{N}_4] = 300 \text{ mg L}^{-1}$ ).

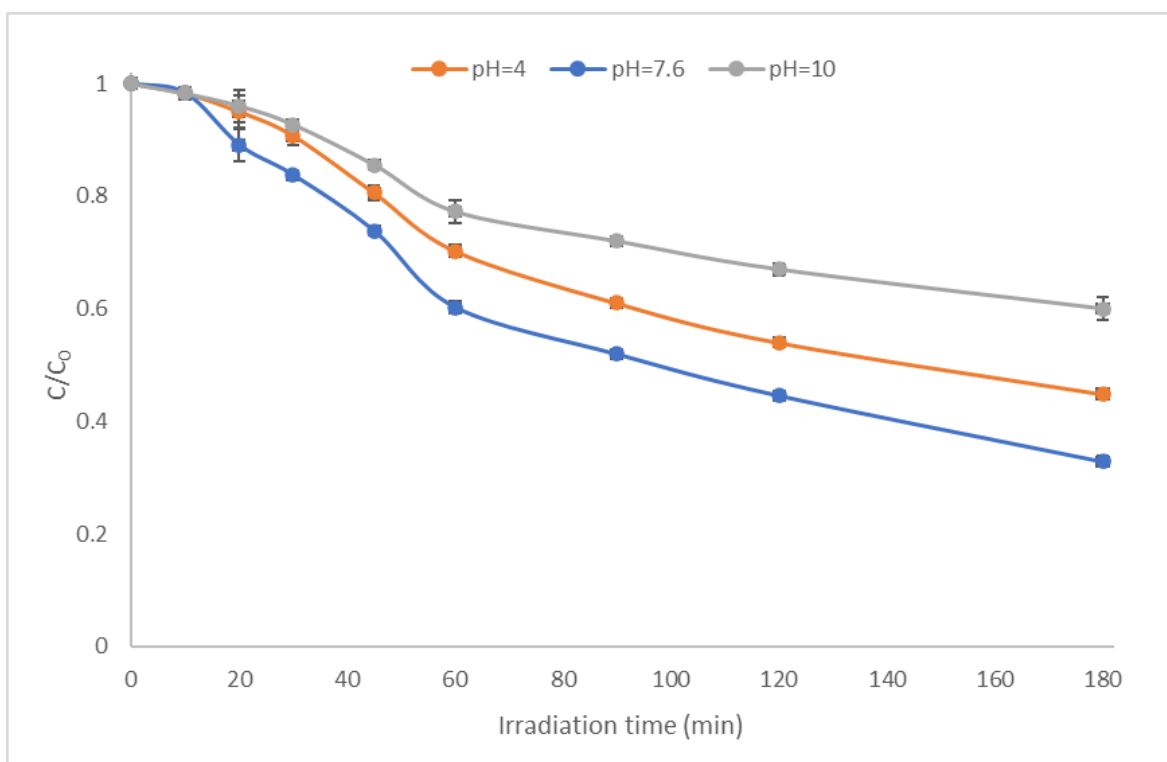

**Figure S3.** Effect of pH on the photocatalytic degradation of amisulpride in WW ( $[\text{amisulpride}]_0 = 1 \text{ mg L}^{-1}$ ,  $[\text{g-C}_3\text{N}_4] = 300 \text{ mg L}^{-1}$ ).
